# Supplementary material for: Identification of Compounds With Glucocorticoid Sparing Effects on Suppression of Chemokine and Cytokine Production by Rheumatoid Arthritis Fibroblast-Like Synoviocytes
Source: PubMed Central journal article supplement (PMC7773657; doi:10.3389/fphar.2020.607713), 2020-12-17
Supplement: table1.pdf [file table1.pdf]

Supplemental Table 1. Commercially Purchased Hit Compounds

| Chemotype | Compound | MW (g/mol) | Vendor     | Catalog ID | Structure |
|-----------|----------|------------|------------|------------|-----------|
| 1         | 1-1      | 321        | ChemDiv    | K402-0050  |           |
| 1         | 1-2      | 295        | ChemDiv    | K402-0009  |           |
| 3         | 3-1      | 261        | ChemBridge | 5402902    |           |
| 5         | 5-1      | 276        | ChemBridge | 5302354    |           |
| 5         | 5-2      | 300        | ChemBridge | 5346896    |           |
| 5         | 5-3      | 312        | ChemBridge | 5350540    |           |
| 13        | 13-1     | 454        | ChemDiv    | 5282-0180  |           |
| 13        | 13-2     | 454        | ChemDiv    | 5282-0176  |           |
| 17        | 17-1     | 417        | ChemDiv    | G274-0173  |           |
